# Supplementary material for: Development and exploitation of a novel mutant androgen receptor modelling strategy to identify new targets for advanced prostate cancer therapy
Source: PubMed Central journal article supplement (PMC4694883; doi:10.18632/oncotarget.4347), 2015-07-20
Supplement: oncotarget-06-26029-s001.pdf [file oncotarget-06-26029-s001.pdf]

## SUPPLEMENTARY MATERIALS AND METHODS

### Plasmids, lentivirus and LNCaP-AR<sub>W741L</sub> production

The p(ARE)<sub>3</sub>-luciferase reporter has been previously described (34) and pFLAG-wtAR was a kind gift from Ralf Janknecht (Oklahoma University, Rochester, MN). pFLAG-AR<sub>T877A</sub> and -AR<sub>W741L</sub> were generated in house by site-directed mutagenesis (Agilent Technologies) using pFLAG-wtAR as a template (see Supplementary Table S1 for primer sequences). FLAG-AR<sub>W741L</sub> and FLAG-wtAR were subsequently cloned into the pENTR™/D-TOPO vector (Life Technologies) before sub-cloning into the pLenti6.3/V5-DEST (Life Technologies) to generate the pLenti-FLAG-AR<sub>W741L</sub> and pLenti-FLAG-wtAR, respectively.

The ViraPower Lentiviral Expression System kit (Life Technologies) was used to generate viral particles as per the manufacturer's guidelines. Briefly,  $5 \times 10^6$  HEK293T cells grown in reduced serum Opti-MEM I medium (Life Technologies) were transfected with either pLenti-FLAG-AR<sub>W741L</sub> or pLenti-FLAG-wtAR and the ViraPower packaging mix using Lipofectamine 2000 (Life Technologies). After 24 hours, culture media was replaced with fresh full media and incubated for an additional 72 hours, prior to virus collection and concentration using ultracentrifugation at 26,500 g for 2 hours at 4°C. The viral pellet was then resuspended in full media and stored at -80°C.

Using a multiplicity of infection (MOI) of 0.3 and 0.1, LNCaP cells were transduced with either pLenti-AR<sub>W741L</sub>, pLenti-wtAR or empty pLenti-LacZ control virus and several stably expressing clones of each, termed LNCaP-AR<sub>W741L</sub>, LNCaP-wtAR and LNCaP-LacZ, respectively, were selected with 10 µg/ml blasticidin, expanded and, for LNCaP-AR<sub>W741L</sub> and LNCaP-wtAR derivatives, ectopic AR expression was determined by western blotting using a FLAG antibody. Depletion of endogenous AR was initially optimised with three 3'-UTR-targeting siRNAs (labelled siAR<sub>T877A</sub>-1/2/3; see Supplementary Table S2 for all siRNA sequences) and all subsequent experiments utilised the siAR<sub>T877A</sub>-2 oligonucleotide (referred to as siAR<sub>T877A</sub> in the manuscript). To knockdown ectopically-expressed AR<sub>W741L</sub>, an oligonucleotide targeting the linker sequence between the FLAG-tag and receptor cDNA was utilised (labelled siAR<sub>W741L</sub>). All siRNA transfection experiments were conducted as described in (35) using RNAiMax (Life Sciences) with the exception that we utilised a double knockdown strategy to maintain and maximise knockdown by approximately 90% for up to 5 days. All experiments incorporated a control scrambled sequence siRNA (siScr).

LNCaP, PC3 and HEK293T cells were purchased from American Type Culture Collection (ATCC). cDNA

from the KUCaP xenograft model was a kind gift from Dr Osamu Ogawa.

### Chromatin immunoprecipitation (ChIP) analysis

ChIP assays were performed as described in (35) utilising antibodies listed in Supplementary Table 3. Quantitative PCR of resultant ChIP'd DNA was performed using primers to several AR-target genes (see Supplementary Table 2 for sequences). For ChIP experiments investigating recruitment of AR<sub>W741L</sub> to target genes, LNCaP-AR<sub>W741L</sub> cells grown in steroid-depleted media were transfected with either siAR<sub>T877A</sub>, siAR<sub>W741L</sub> and siScr control oligonucleotides for 68 hours prior to 4 hour stimulation with either 1 nM dihydrotestosterone (DHT), 10 nM bicalutamide, 10 µM enzalutamide or vehicle control prior to chromatin preparation.

### Micro-array analysis

RNA was extracted from both LNCaP-AR<sub>W741L</sub> cells subjected to endogenous or ectopic AR knockdown, and LNCaP-LacZ cells grown in steroid-depleted media treated with vehicle, 1 nM DHT, 10 nM bicalutamide as described above. Triplicate samples were hybridised onto an Illumina HT12 v4 BeadChip Array (performed by The Wellcome Trust Centre for Human Genetics, Oxford University) and analysed using GenomeStudio (Illumina) to assess differential gene expression incorporating quantile normalisation and multiple sample testing correction using Benjamini and Hochberg false discovery rate ( $p < 0.05$ ). Genes were filtered further using custom equations to exclude genes with an insignificant detection  $p$ -value as recommended by Illumina ( $p < 0.05$ ). Compound treated samples were expressed as fold-change by dividing the average sample signal by vehicle treated controls. Data is represented as the mean of three independent experiments. Genes without a gene symbol/ID and those with locus specific entries were removed from the overall analysis. Additionally, as ligand-induced genes were the primary end-point, only genes that exhibited increased expression were analysed further.

For *SGK1* expression analysis from the Taylor *et al.*, patient biopsy data-set (28), the normalised log<sub>2</sub> mRNA expression data was downloaded from the MSKCC Prostate Cancer Genomics Data Portal: <http://cbio.mskcc.org/prostate-portal/>. Samples representing normal tissue and cell lines/xenografts were removed from the dataset. This leaves 150 prostate cancer samples, with only 1 expressing the AR<sub>W741C</sub> mutation (PCA0188). The resampling approach was used to estimate the probability of obtaining expression levels of *SGK1* as high as those observed in the AR<sub>W741C</sub> mutant sample from the set of 149 non-AR<sub>W741C</sub> mutant

cancer samples. We resampled one biopsy data-set at a time from the non-mutant samples (with replacement) one million times at random. In each iteration, the expression value of that gene from the non-AR<sub>W741C</sub> mutant biopsy was compared to the expression value of the same gene from the AR<sub>W741C</sub> mutant sample. After one million resamplings,

we calculated the probability (*p*-value) of non-AR mutant biopsies expressing a specific gene greater than in the AR<sub>W741C</sub> biopsy. This is the number of resamplings that have a greater level of expression than those of the expression of the same respective genes in the mutant sample divided by 1,000,000.

## SUPPLEMENTARY FIGURES AND TABLES

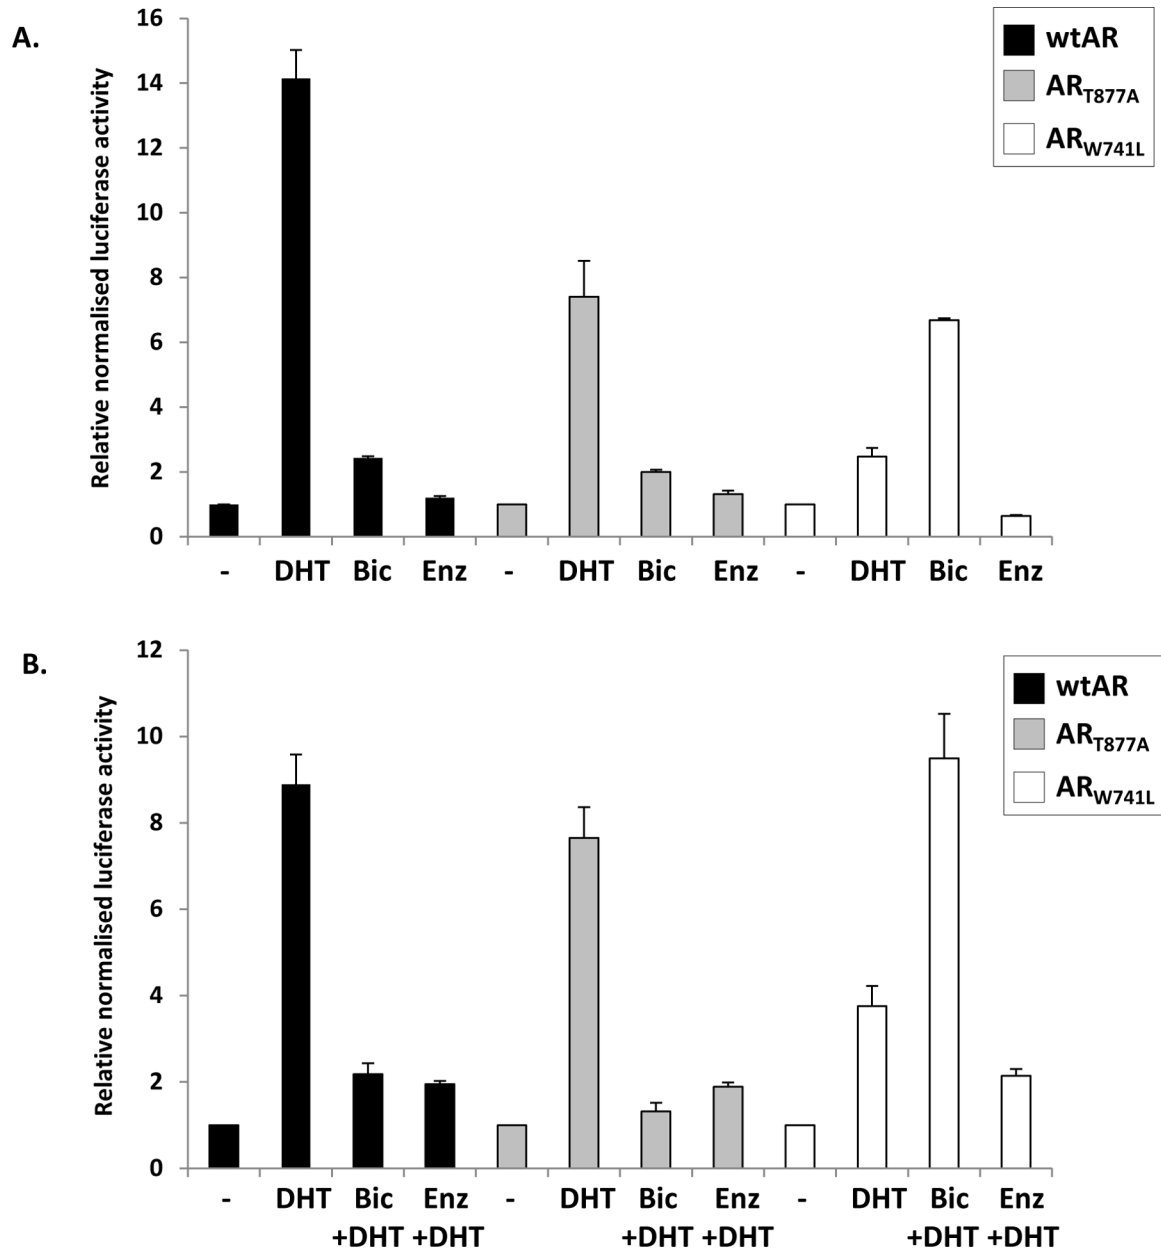

**Supplementary Figure S1: AR<sub>W741L</sub> demonstrates distinct activation profiles to wild-type AR and AR<sub>T877A</sub>.** A. PC3 cells transfected with wild-type AR (wtAR), AR<sub>W741L</sub> and AR<sub>T877A</sub> and a receptor-responsive luciferase reporter were treated with single agent doses of 10 nM DHT, 10  $\mu$ M bicalutamide and 10  $\mu$ M enzalutamide for 24 hours before luciferase expression analysis. Data represents three independent repeats  $\pm$  standard error. B. As for (A), but cells were cultured for 24 hours in dual DHT +/- bicalutamide or enzalutamide treatments.

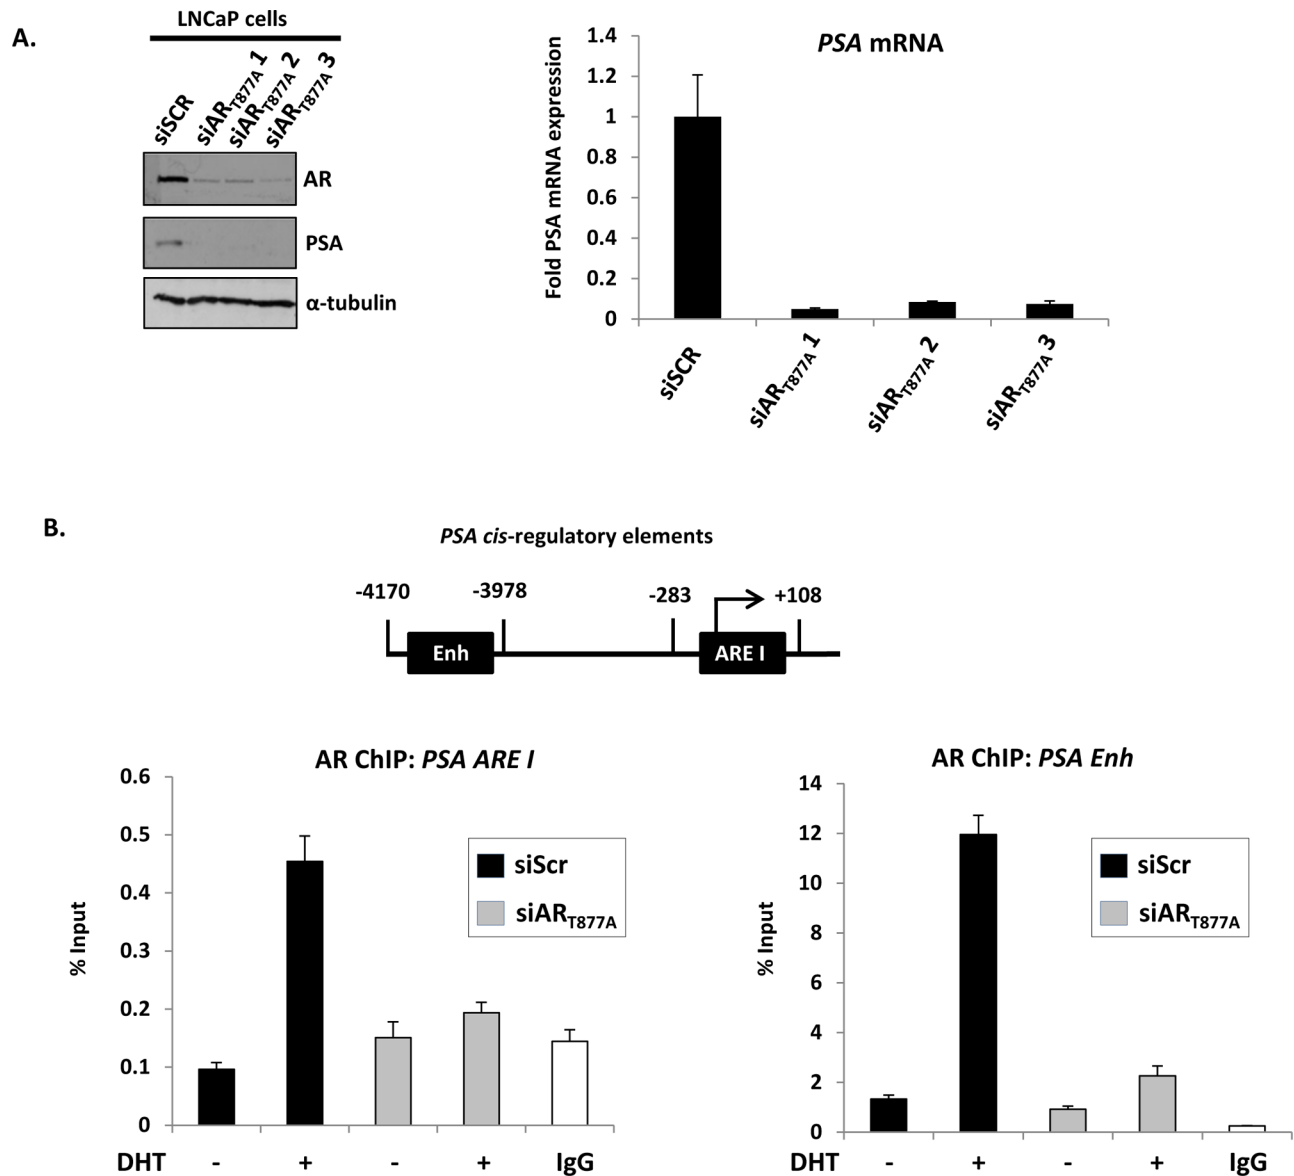

**Supplementary Figure S2: AR 3'-UTR-targeting siRNAs deplete endogenous AR<sub>T877A</sub> in LNCaP cells.** A. LNCaP cells were transiently transfected with three AR 3'-UTR specific siRNAs (termed siAR<sub>T877A</sub> 1–3) or scrambled control (siScr) for 72 hours prior to western analysis using AR, PSA and  $\alpha$ -tubulin antibodies (left panel) and quantitative PCR analysis of PSA expression (right panel). B. LNCaP cells depleted of endogenous AR were treated with and without 10 nM DHT for 4 hours prior to ChIP analysis using an anti-AR antibody and quantitative PCR analysis using primers specific for PSA promoter and enhancer elements.

A.

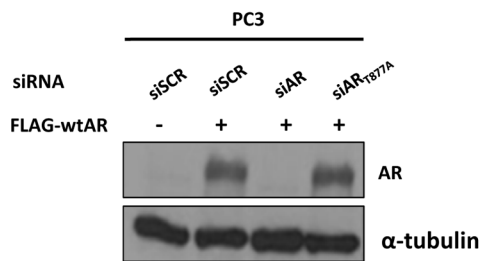

B.

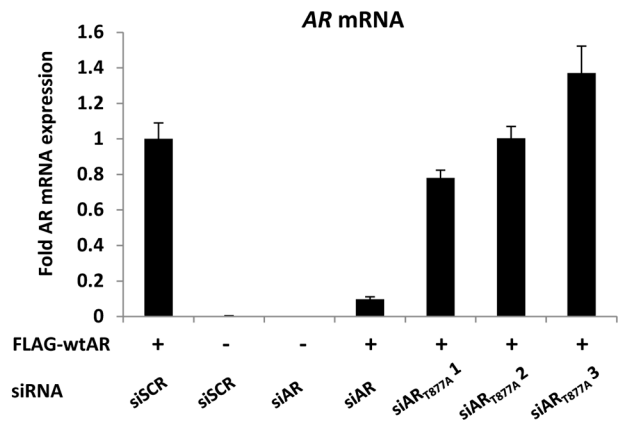

**Supplementary Figure S3: Ectopically expressed AR is not targeted by AR 3'-UTR-targeting oligonucleotides.** A. PC3 cells were transiently transfected with and without FLAG-tagged AR for 24 hours prior to sequential transfection with either siScr, siAR<sub>T877A</sub> or a coding sequence-specific AR siRNA (siAR) for 48 hours prior to western analysis using AR and  $\alpha$ -tubulin antibodies. B. As in (A), but cells were subsequently harvested for RNA extraction and quantitative PCR to assess AR expression.

**LNCaP cells**

A.

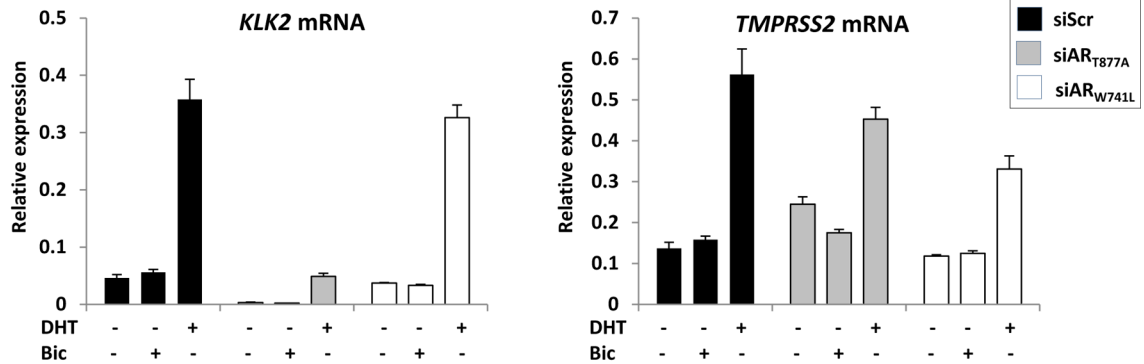

B.

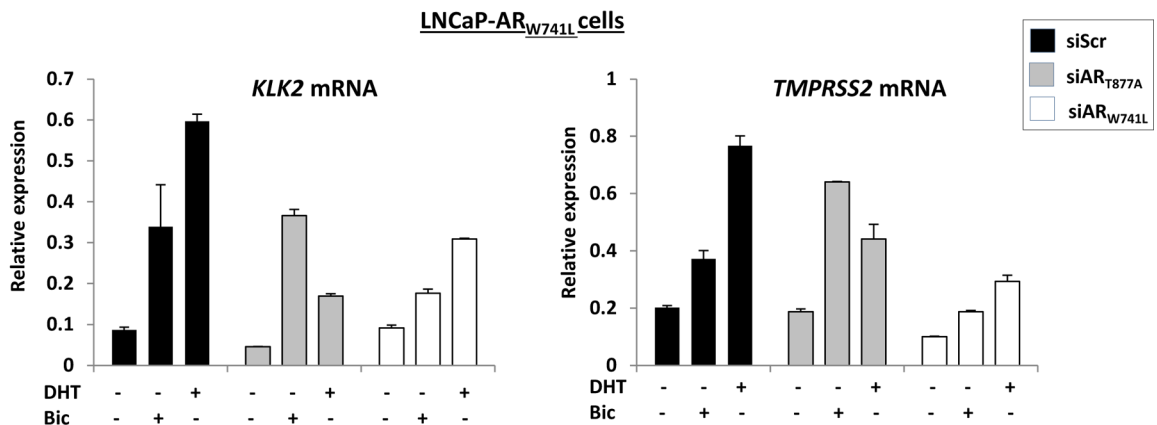

**Supplementary Figure S4: Stably-integrated AR<sub>W741L</sub> in LNCaP cells up-regulates endogenous KLK2 and TMPRSS2 in the presence of bicalutamide.** Quantitative PCR analysis of KLK2 and TMPRSS2 expression in parental LNCaP cells A. and the LNCaP-AR<sub>W741L</sub> derivative B. depleted of either endogenous or ectopic receptors treated with 1 nM DHT or 10 nM bicalutamide for 24 hours. Data represents the mean of three independent experiments  $\pm$  standard error.

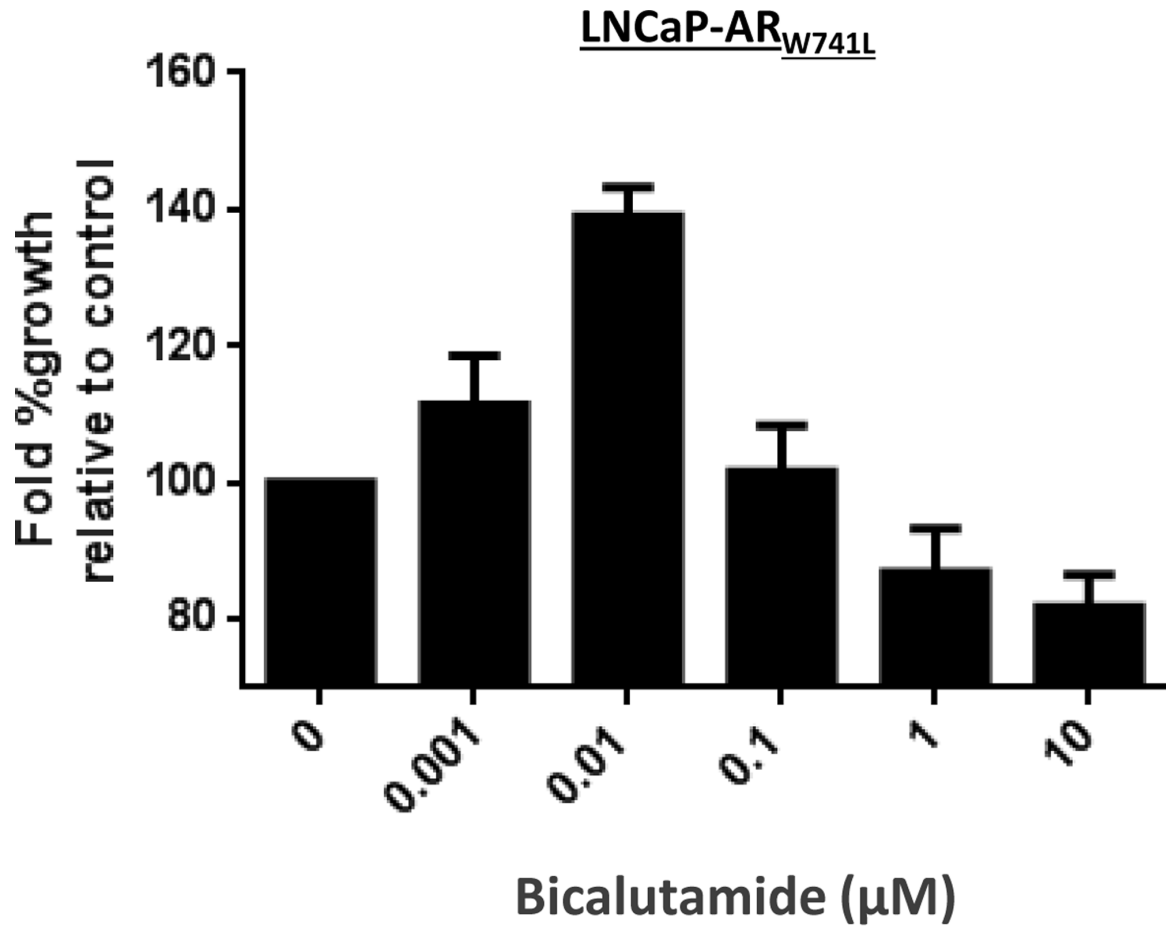

**Supplementary Figure S5: Optimising bicalutamide-driven LNCaP-AR<sub>W741L</sub> growth.** LNCaP-AR<sub>W741L</sub> were grown in the presence of increasing doses of bicalutamide for 96 hours prior to SRB staining.

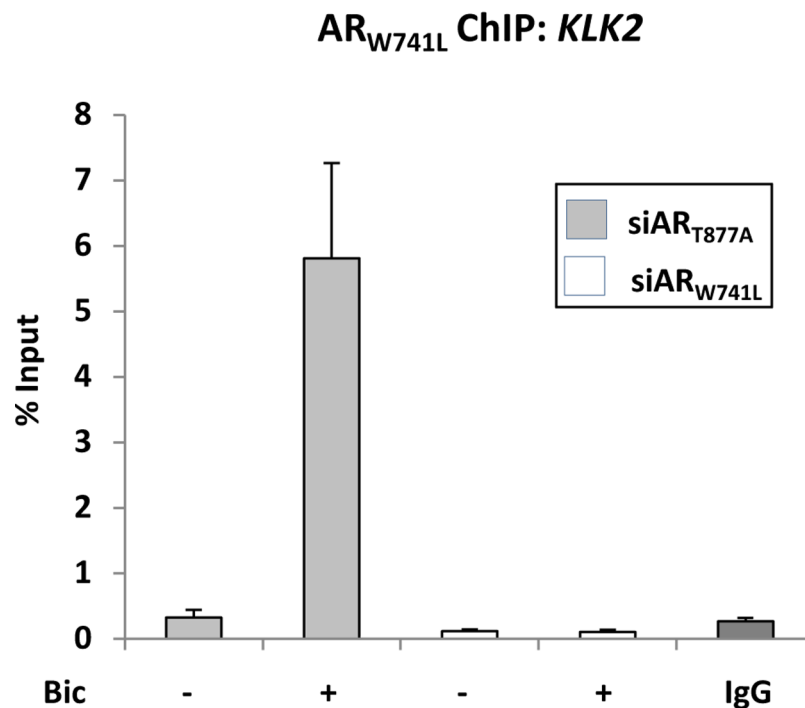

**Supplementary Figure S6: AR<sub>W741L</sub> is recruited to the *KLK2* promoter in response to bicalutamide.** LNCaP-AR<sub>W741L</sub> cells depleted of either endogenous or ectopic AR were treated with 1 nM DHT or 10 nM bicalutamide for 4 hours prior to chromatin immunoprecipitation (ChIP) analysis using a FLAG antibody to immunoprecipitate FLAG-AR<sub>W741L</sub>. Receptor recruitment to the *KLK2* promoter was assessed by quantitative PCR.

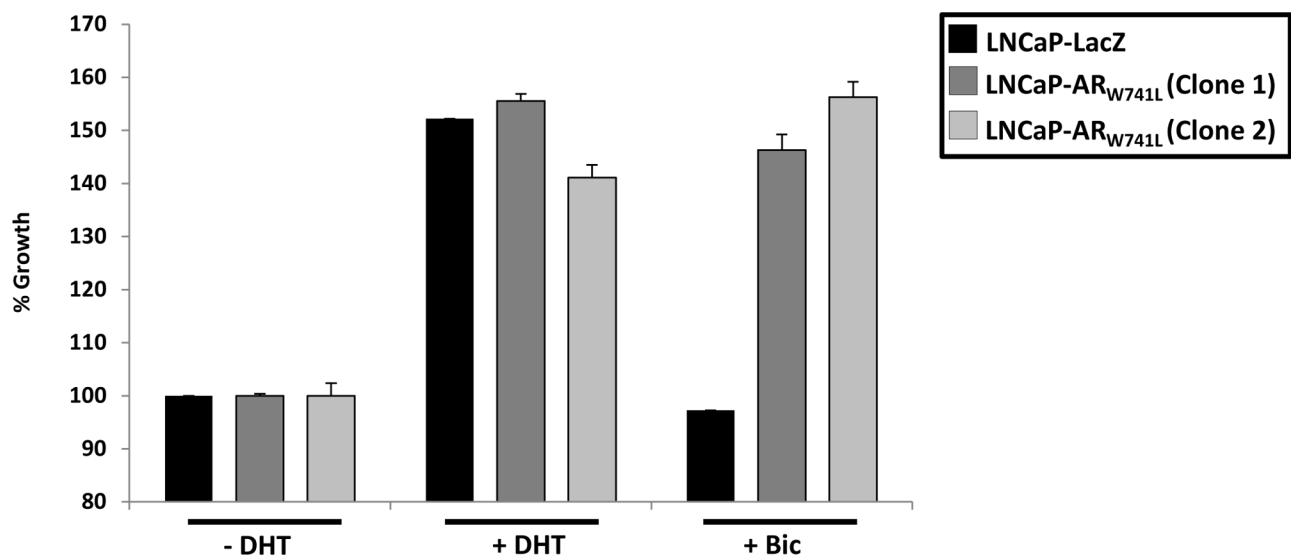

**Supplementary Figure S7: Additional LNCaP-AR<sub>W741L</sub> clone demonstrates equivalent growth response to bicalutamide.** The growth of a second LNCaP-AR<sub>W741L</sub> clonal population (LNCaP-AR<sub>W741L</sub> clone 2) was tested in response to 1 nM DHT and 10 nM bicalutamide and compared to LNCaP-LacZ and the original LNCaP-AR<sub>W741L</sub> clone (clone 1). After 96 hours, cells were subject to SRB staining. Data is represented as fold % growth relative to vehicle  $\pm$  standard deviation.

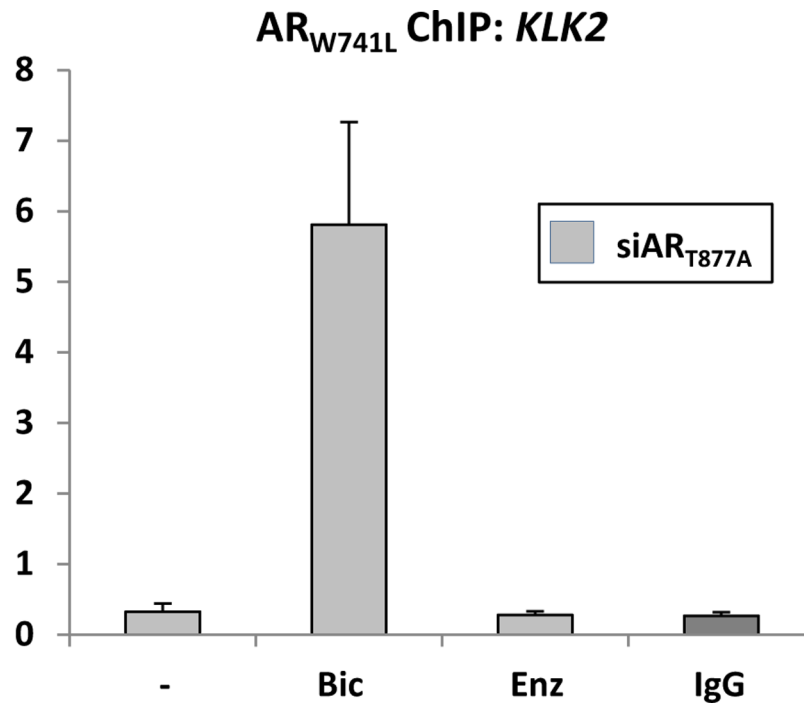

**Supplementary Figure S8: Bicalutamide-driven AR<sub>W741L</sub> binding to the KLK2 promoter is attenuated by enzalutamide.** LNCaP-AR<sub>W741L</sub> cells transfected with siScr or siAR<sub>T877A</sub> were treated for 4 hours with either 1 nM DHT or bicalutamide + 10  $\mu$ M enzalutamide prior to ChIP and quantitative PCR analysis using primers specific to AR-target genes.

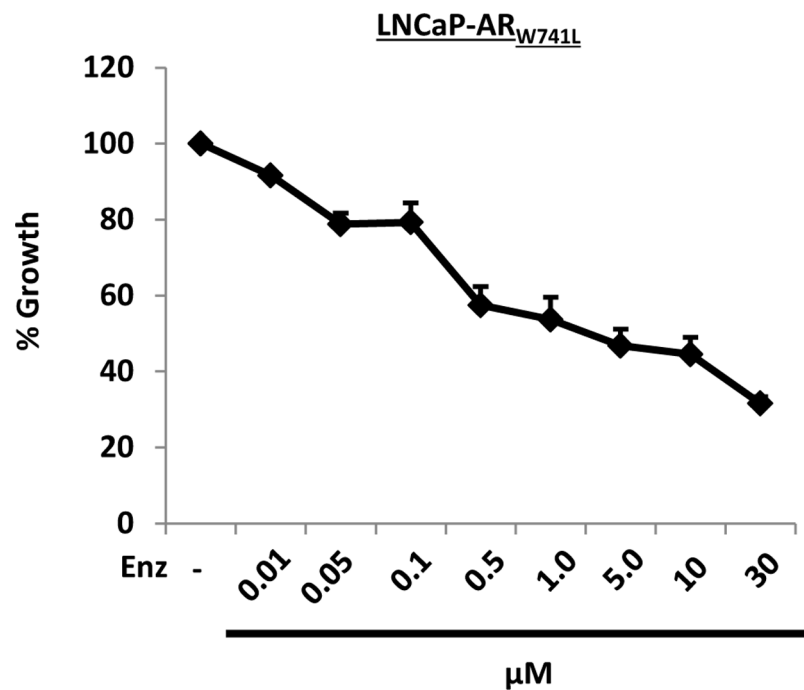

**Supplementary Figure S9: Enzalutamide inhibits steady-state growth of LNCaP-AR<sub>W741L</sub>.** LNCaP-AR<sub>W741L</sub> cells depleted of endogenous receptor using siAR<sub>T877A</sub> oligonucleotides were treated with an increasing dose of enzalutamide for 96 hours prior to staining with SRB. Percentage growth is relative to vehicle control. Data is the mean of two independent experiments  $\pm$  standard error.



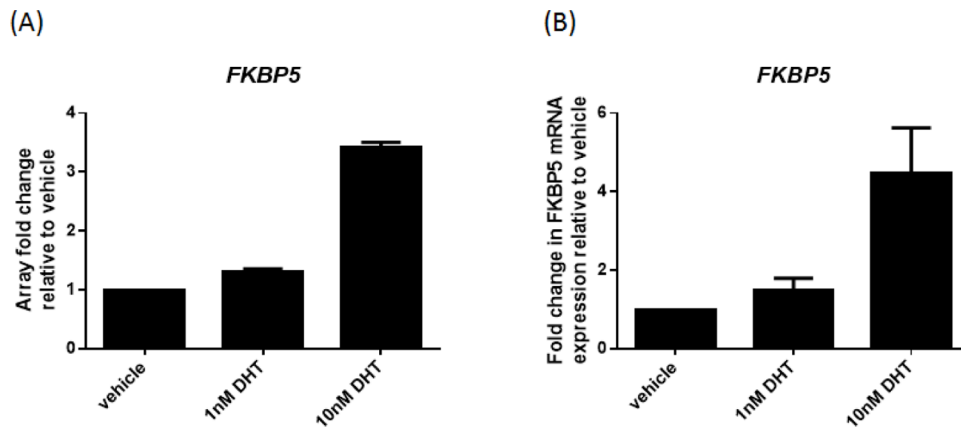

**Supplementary Figure S10: DHT concentration dependent expression of FKBP5 in LNCaP-LacZ cells.** Expression of FKBP5 in response to 1 nM and 10 nM DHT in LNCaP-LacZ cells was determined by **A.** bead chip array and **B.** quantitative PCR. Data are the mean of three independent experiments  $\pm$  standard error.

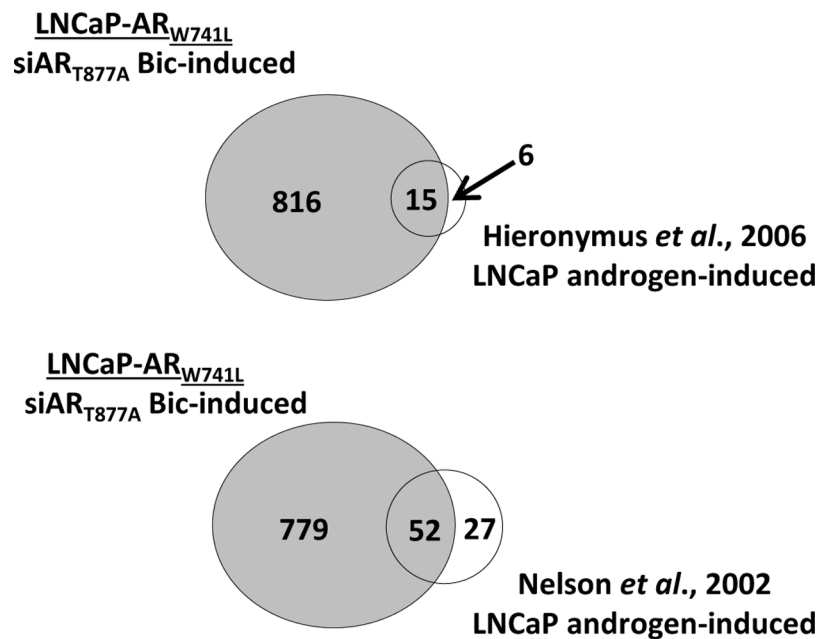

**Supplementary Figure S11: Comparison of bicalutamide-activated AR<sub>W741L</sub> transcriptome with defined androgenic gene signatures.** The 831 core set of bicalutamide-induced genes in LNCaP-AR<sub>W741L</sub> were directly compared to two androgenic signalling programs previously published by Hieronymus et al., (2006) and Nelson et al., (2002).

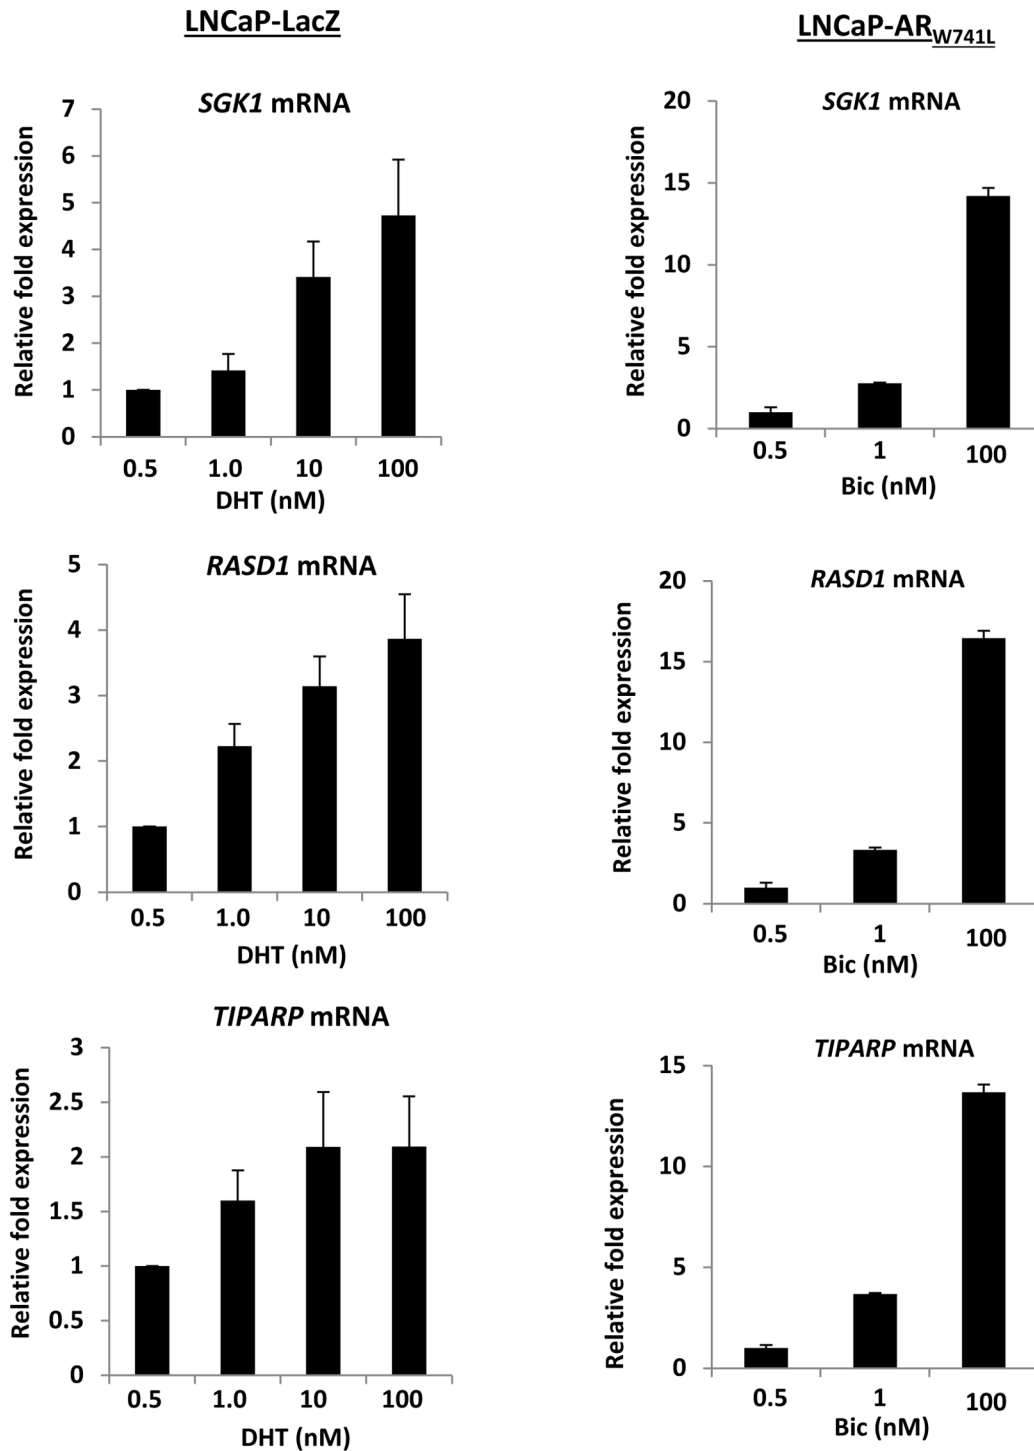

**Supplementary Figure S12: *SGK1*, *TIPARP* and *RASD1* expression profiling in LNCaP-LacZ and LNCaP-AR<sub>W741L</sub> in response to DHT dose-range.** LNCaP-LacZ cells, and LNCaP-AR<sub>W741L</sub> cells that were depleted of endogenous AR, were treated for 24 hours with increasing doses of either DHT or Bicalutamide (Bic), respectively, prior to quantitative analysis of *SGK1*, *TIPARP* and *RASD1* expression.

**LNCaP cells**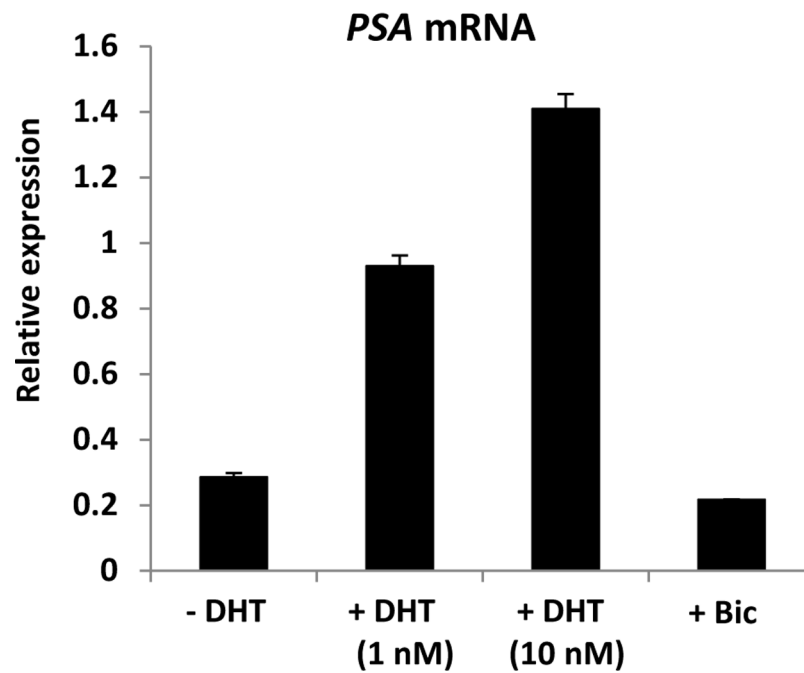

**Supplementary Figure S13: Confirming response of LNCaP cells to DHT.** LNCaP cells were treated for 24 hours with either 1 or 10 nM DHT prior to quantitative analysis of *PSA* expression.

**LNCaP-wtAR**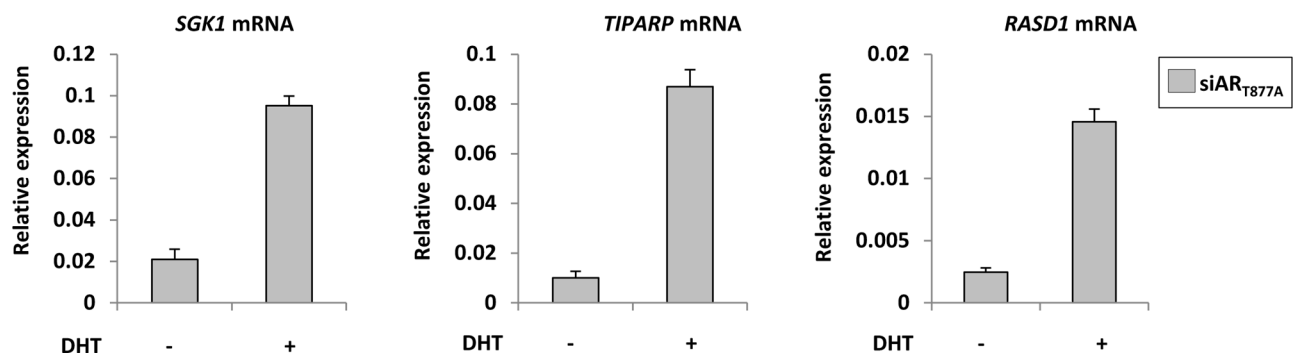

**Supplementary Figure S14: *SGK1*, *TIPARP* and *RASD1* expression in LNCaP-wtAR cells.** The LNCaP-wtAR cell line derivative that ectopically expresses wild-type AR was subject to endogenous AR<sub>T877A</sub> knockdown for 48 hours prior to 24 hour DHT stimulation and quantitative analysis of gene expression.

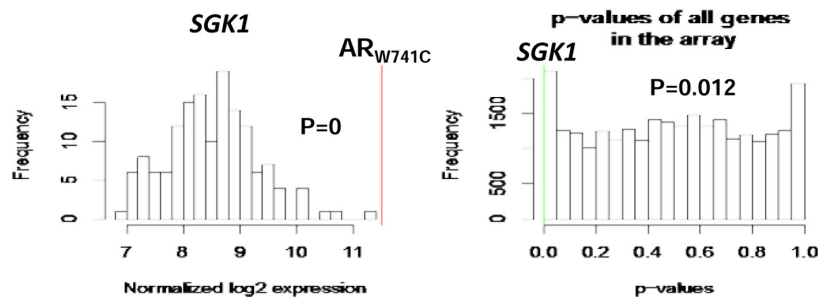

**Supplementary Figure S15: *SGK1* expression is markedly up-regulated in an AR<sub>W741C</sub>-expressing patient biopsy.** Histograms of normalized log<sub>2</sub> expression level of *SGK1* among the 149 non-AR<sub>W741C</sub> cancer samples. Red vertical lines mark the normalized expression level of the gene in the AR<sub>W741C</sub> mutant sample. To check if the *p*-value for *SGK1* is likely to be expected for other genes in the AR<sub>W741C</sub> sample, genes demonstrating significantly higher expression compared to non-AR<sub>W741C</sub>-expressing biopsies were identified and the probability of getting a *p*-value as extreme as observed for *SGK1* was calculated. There are 329 other genes (out of 26447) whose *p*-value is as extreme as *SGK1*; meaning the probability of getting a *p*-value as extreme as *SGK1* is 0.012 (Lower right-hand panel).

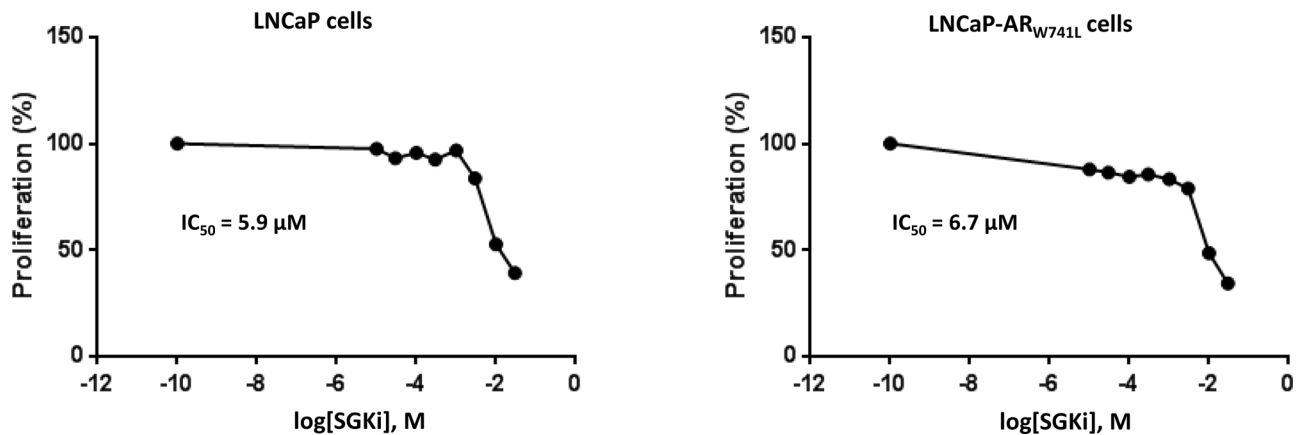

**Supplementary Figure S16: IC<sub>50</sub> values for LNCaP and LNCaP-AR<sub>W741L</sub> cells.** LNCaP and LNCaP-AR<sub>W741L</sub> cells were grown in serum-containing conditions and treated with 0, 0.01, 0.03, 0.1, 0.3, 1, 3, 10, 30 μM *SGK1* inhibitor for a total of 96 hours and cell confluency was measured using the Essenbioscience Incucyte live cell imager.

**Supplementary Table S1: Sequences of forward and reverse primers used for quantitative PCR expression analysis of indicated genes and AR<sub>W741L</sub> mutagenesis primers**

| Gene                            | Forward primer sequence                   | Reverse primer sequence   |
|---------------------------------|-------------------------------------------|---------------------------|
| AR                              | CATGTGGAAGCTGCAAGGTCT                     | TCTGTTCCCTTCAGCGGC        |
| PSA (KLK3)                      | GGTGCATTACCGGAAGTGGAT                     | TGGTCATTTCCAAGGTTCCAA     |
| KLK2                            | AGCATCGAACCAGAGGAGTTCT                    | TGGAGGCTCACACACCTGAAGA    |
| TMPRSS2                         | CTGCTGGATTTCCGGGTG                        | TTCTGAGGTCTTCCCTTTCTCCT   |
| FKBP5                           | CCCCCTATTTTAATCGGAGTAC                    | TTTTGAAGAGCACAGAACCACCT   |
| NDRG1                           | ACAACCCCTCTTCAACTACG                      | GCCAATAATGCTTTTCAGCCCA    |
| RASD1                           | GTGTTTCAGTCTGGACAACCGC                    | CTGCTCGATCTCGCGCTGGTC     |
| TIPARP                          | CGTCTGGGAGTAGGCAAT                        | CCCGAGGGAGGATGTGAAAC      |
| SGK1                            | ATGACGGTGAAAACGAGGC                       | GACGTGTCTTGCGGAATTTG      |
| HPRT1                           | TTGCTTTCCTTGGTGAGGCA                      | AGCTTGCACCTTGACCATCT      |
| PSA ARE I (ChIP)                | CCTAGATGAAGTCTCCATTGAGCTACA               | GGGAGGGAGAGCTAGCACTTG     |
| PSA ARE III (ChIP)              | TGGGACAACCTGCAAACCTG                      | CCAGAGTAGGTCTGTTTTCAATCCA |
| TMPRSS2 (ChIP)                  | TGGTCCTGGATGATAAAAAAAGTTT                 | GACATACGCCCCACAACAGA      |
| KLK2 (ChIP)                     | ACCCCTGTTGCTGTTTCATCCTG                   | CCGCCCTTGCCCTGTTGG        |
| AR <sub>W741L</sub> Mutagenesis | GTCATTCAGTACTCCTTGATGGGG<br>CTCATGGTG     |                           |
| AR <sub>H874Y</sub> Mutagenesis | CTATTGCGAGAGAGCTGTATCAG<br>TTCACCTTTTGACC |                           |

**Supplementary Table S2: Sequences of siAR<sub>W741L</sub>, siAR<sub>T877A</sub> and siAR siRNA oligonucleotides**

|                         |                           |
|-------------------------|---------------------------|
| siAR <sub>T877A</sub> 1 | CCAGUGUCAAGUUGUGCUUdTdT   |
| siAR <sub>T877A</sub> 2 | GCCAGCCACACAAACGUUdTdT    |
| siAR <sub>T877A</sub> 3 | GGGAAGUUUAGAGAGCUAAdTdT   |
| siAR <sub>W741L</sub> 1 | CAGUCGACUCUAGAGGAUCCAdTdT |
| siAR <sub>W741L</sub> 2 | UAGAGGAUCCAUGGAAGUGCAdTdT |
| siAR                    | CCAUCUUUCUGAAUGUCCUdTdT   |

**Supplementary Table S3: Commercial antibodies used in study**

|                   |                          |
|-------------------|--------------------------|
| AR N20 (SC-816)   | Santa Cruz Biotechnology |
| $\alpha$ -Tubulin | Sigma                    |
| PSA               | Gift from Kim Pettersson |
| FLAG              | Sigma                    |
| pSer5-RNA Pol II  | Abcam                    |

**Supplementary Table S4: Genes found to be up-regulated >1.5-fold in the LNCaP-AR<sub>W741L</sub> derivative depleted of AR<sub>I877A</sub> in response to bicalutamide**

|         |           |          |         |          |          |  |
|---------|-----------|----------|---------|----------|----------|--|
| ABCC1   | ATP6V1C1  | C3orf70  | CKAP2   | DNAJC3   | F2RL1    |  |
| ABCC4   | ATP7B     | C6orf106 | CLDN8   | DNAL1    | FADS1    |  |
| ABCC8   | AVEN      | C6orf81  | CLEC4D  | DNM1L    | FADS2    |  |
| ABCD3   | AZGP1     | C7orf54  | CLGN    | DNM2     | FAM103A1 |  |
| ABCF3   | B4GALT1   | C7orf68  | CLIC4   | DOCK5    | FAM104A  |  |
| ABHD3   | BBX       | C8orf42  | CLPTM1L | DPH3     | FAM105A  |  |
| ACAA1   | BCAP29    | C9orf152 | CMAS    | DPYSL4   | FAM105B  |  |
| ACAD8   | BEND4     | C9orf91  | CNN2    | DSN1     | FAM114A1 |  |
| ACAT2   | BMPR1A    | CALCOCO2 | COL6A1  | DSP      | FAM129B  |  |
| ACPL2   | BNIP3     | CALU     | COX18   | DTL      | FAM13AOS |  |
| ACSL1   | BRP44     | CAMK1G   | CPEB4   | DUSP2    | FAM45B   |  |
| ACSL3   | C10orf114 | CAMKK2   | CRAMP1L | DYNC1LI1 | FAM49B   |  |
| ACTA2   | C10orf6   | CANT1    | CREB3L2 | DYNLL2   | FAM54A   |  |
| ADAM9   | C10orf88  | CAP1     | CREB3L4 | EAF2     | FAM58A   |  |
| AGR2    | C11orf82  | CAP2     | CREM    | EBP      | FAM64A   |  |
| AHNAK   | C12orf23  | CAPN2    | CRYBB2  | EDC3     | FAM83F   |  |
| AK3L1   | C12orf44  | CAPZB    | CSK     | EDG7     | FAM91A1  |  |
| AKAP13  | C13orf1   | CARD11   | CTGF    | EEA1     | FANCF    |  |
| AKAP9   | C13orf15  | CARD8    | CTNNA1  | EFNA1    | FANCI    |  |
| ALDH1A3 | C14orf118 | CBLL1    | CUL4B   | EFNA5    | FARP1    |  |
| ALG11   | C14orf149 | CBWD1    | CWC22   | EGF      | FASN     |  |
| ALG2    | C15orf23  | CBWD3    | CWF19L2 | EGLN1    | FBXL2    |  |
| ALKBH8  | C17orf48  | CBWD5    | CXorf23 | EGLN2    | FBXL3    |  |
| AMACR   | C17orf53  | CCBL1    | CYP2U1  | EGR1     | FBXO31   |  |
| ANKRD22 | C17orf79  | CCDC120  | CYP51A1 | EIF2AK3  | FBXO38   |  |
| ANKRD27 | C17orf80  | CCDC15   | CYR61   | ELK4     | FBXW2    |  |
| ANKRD28 | C17orf91  | CCDC41   | DAPK3   | ELL2     | FCHO2    |  |
| ANKRD32 | C18orf19  | CD164    | DBI     | ELOVL5   | FDFT1    |  |
| ANKRD37 | C18orf54  | CD9      | DCBLD1  | ELOVL7   | FDPS     |  |
| ANLN    | C19orf23  | CDC14B   | DDHD1   | EME1     | FHDC1    |  |
| ANXA2   | C19orf26  | CDC25A   | DDX3Y   | EMP1     | FICD     |  |
| ANXA2P1 | C19orf71  | CDC45L   | DEGS1   | ENDOD1   | FKBP5    |  |
| AP2B1   | C1orf102  | CDC7     | DEPDC1B | ENTPD7   | FKSG30   |  |
| AP3S1   | C1orf116  | CDH15    | DHCR24  | EPB41L4B | FLJ20254 |  |
| APIP    | C1orf149  | CDK6     | DHCR7   | EPDR1    | FLJ20273 |  |
| ARAP2   | C1orf21   | CDR2     | DHFR    | EPS15    | FLJ23754 |  |

(Continued)

|          |           |          |            |          |          |  |
|----------|-----------|----------|------------|----------|----------|--|
| ARFGEF2  | C1orf26   | CDYL2    | DHODH      | ERCC6L   | FLJ31568 |  |
| ARHGAP28 | C1orf27   | CEMP1    | DIS3L2     | ERGIC2   | FLJ40504 |  |
| ARIH1    | C1orf9    | CENPC1   | DISP1      | ERO1L    | FLJ44635 |  |
| ARMET    | C20orf175 | CENPN    | dJ341D10.1 | ERRFI1   | FLNA     |  |
| ARRDC1   | C21orf128 | CENPO    | DLL1       | ESCO1    | FMO4     |  |
| ARSG     | C21orf56  | CHAC2    | DMXL1      | ESCO2    | FNBP1L   |  |
| ASB7     | C2orf30   | CHD1L    | DNAJB14    | ETAA1    | FNDC3B   |  |
| ASF1B    | C2orf49   | CHEK1    | DNAJB4     | EVL      | FOXC1    |  |
| ATAD2    | C2orf76   | CHST2    | DNAJB9     | EXOC8    | FOXD4    |  |
| ATP1A1   | C3orf25   | CHSY1    | DNAJC2     | EXOD1    | FOXD4L1  |  |
| FOXD4L2  | HARBI1    | ITPKA    | LYSMD3     | NAGK     | PCYT2    |  |
| FOXO1    | HBA2      | ITPKC    | LZTFL1     | NAMPT    | PDCD10   |  |
| FRAG1    | HBEGF     | ITPRIP   | MALT1      | NANOS1   | PDE8B    |  |
| FRAP1    | HCFC2     | JHDM1D   | MAP1LC3B   | NANS     | PDIA5    |  |
| FRK      | HERC3     | KCNG3    | MAP2K4     | NARG1L   | PDLIM1   |  |
| FRMD3    | HERPUD1   | KCNK9    | MAP7       | NARG2    | PDLIM5   |  |
| FRYL     | HGD       | KCNN2    | MAP7D1     | NCAPD3   | PDS5B    |  |
| FUT11    | HIF1A     | KCNRG    | MAP9       | NCKAP1   | PDXP     |  |
| FUT4     | HIPK2     | KCTD3    | MAPK7      | NDFIP2   | PEA15    |  |
| FZD1     | HIST1H3D  | KDEL2R2  | MASTL      | NDRG1    | PEBP4    |  |
| GABPB1   | HIST1H4E  | KDEL2R3  | MCCC2      | NEBL     | PECI     |  |
| GADD45B  | HIST1H4H  | KDSR     | MCEE       | NEURL1B  | PELO     |  |
| GADD45G  | HJURP     | KIAA0232 | MCM10      | NFIB     | PFKFB2   |  |
| GALK2    | HK2       | KIAA1009 | MCPH1      | NFKBIA   | PFKFB4   |  |
| GALNTL4  | HLA-DMA   | KIAA1712 | MEAF6      | NKX3-1   | PGBD3    |  |
| GBA2     | HLA-DRB4  | KIAA2010 | MED31      | NOTCH2NL | PGC      |  |
| GBE1     | HMGCR     | KIF15    | MERTK      | NRAS     | PGM3     |  |
| GBF1     | HMGCS1    | KIF22    | MFSD6      | NRG4     | PHACTR2  |  |
| GCAT     | HOMER1    | KIFC1    | MGAT2      | NSDHL    | PHLDA1   |  |
| GFM1     | HOMER2    | KLF5     | MICAL1     | NSMAF    | PIAS1    |  |
| GFPT1    | HOOK3     | KLF6     | MICALCL    | NT5DC3   | PICALM   |  |
| GINS2    | HS1BP3    | KLHDC8B  | MICALL1    | NUDT16   | PIK3C2A  |  |
| GINS3    | HS3ST1    | KLHL2    | MINPP1     | NUDT18   | PIP5K2A  |  |
| GK5      | HS6ST1    | KLHL36   | MIPEP      | NUDT9    | PKP2     |  |
| GLB1L2   | HSD17B11  | KLK2     | MIR342     | NUP98    | PMEPA1   |  |
| GLRX2    | HSD3B1    | KLK3     | MIR611     | NUPL1    | PNMA1    |  |
| GLUD1    | HSPA13    | KLK4     | MLF1IP     | ODC1     | PNPLA4   |  |
| GMPPA    | HSPC159   | KRT18    | MLH3       | OFD1     | PNPLA8   |  |

(Continued)

|           |              |          |           |           |          |           |
|-----------|--------------|----------|-----------|-----------|----------|-----------|
| GMPPB     | HTR7P        | KRT8     | MLPH      | OGFRL1    | POL3S    |           |
| GNA12     | IBTK         | L3MBTL3  | MMAA      | OKL38     | POLE2    |           |
| GNAI3     | ID2          | LAMC1    | MOBK1B    | ORMDL2    | POLR3E   |           |
| GOLGA4    | IDI1         | LCOR     | MOCOS     | OSBPL11   | POP1     |           |
| GOLGA5    | IDO2         | LDLR     | MON1B     | OSBPL1A   | POTEE    |           |
| GOLPH3    | IFFO2        | LEPREL1  | MORC4     | OSBPL8    | PPAP2A   |           |
| GOLT1B    | IFRG15       | LIFR     | MOS       | OSTC      | PPFIBP1  |           |
| GOSR2     | IGSF5        | LIN7B    | MPHOSPH10 | OSTCL     | PPIB     |           |
| GPR137C   | IKBIP        | LMTK2    | MPHOSPH9  | P4HA1     | PPM1A    |           |
| GPR37     | IL6R         | LONRF1   | MPZL1     | PACS1     | PPM1B    |           |
| GPR89B    | IL6ST        | LPAR3    | MRFAP1    | PACSIN1   | PPM1D    |           |
| GPX8      | IMMP1L       | LPIN1    | MRPS35    | PACSIN2   | PPM2C    |           |
| GRHL1     | IMPDH1       | LRIG1    | MSX1      | PAFAH1B2  | PPP1CB   |           |
| GSTT2     | INPP4B       | LRRC16   | MTMR6     | PAK1IP1   | PPP1R15B |           |
| GSTT2B    | INTS10       | LRRC16A  | MTMR9     | PARP16    | PPP2CB   |           |
| GTSE1     | IQCB1        | LRRC3    | MTP18     | PARVA     | PPP3CC   |           |
| H2AFV     | IRS2         | LRRC59   | MYL12A    | PAX7      | PPP4R2   |           |
| H2AFZ     | ITGAV        | LRRC8A   | MYO9B     | PCTP      | PPPDE1   |           |
| PQLC1     | RNU6ATAC     | SLC30A1  | STAMBPL1  | TPM1      | WDR33    | ZNF695    |
| PRAGMIN   | RP5-1022P6.2 | SLC31A2  | STARD4    | TRAPPC2P1 | WDR41    | ZNF761    |
| PRDX6     | RPRC1        | SLC33A1  | STAU2     | TRIM24    | WDR55    | ZNF844    |
| PREB      | RPRD1B       | SLC35F2  | STIL      | TRIM36    | WDYHV1   | ZSCAN12L1 |
| PRKAB2    | RPS6KA6      | SLC38A1  | STK35     | TRIM48    | WIPI1    |           |
| PRKCABP   | RRAS         | SLC38A2  | STK39     | TRIM52    | WNK3     |           |
| PSMD8     | RRAS2        | SLC39A1  | STOML1    | TRIO      | WNT7B    |           |
| PTGER4    | RRBP1        | SLC39A10 | STYK1     | TRQ1      | WSB1     |           |
| PTGFR     | RREB1        | SLC39A7  | SURF4     | TSC22D1   | WWC1     |           |
| PTPRM     | RRM2         | SLC41A1  | SYNJ1     | TSEN15    | YTHDF1   |           |
| PUSL1     | RSU1         | SLC45A3  | TAF1A     | TSKU      | YWHAQ    |           |
| PVRL3     | S100P        | SLC7A11  | TARP      | T-SP1     | ZBED3    |           |
| PWP1      | S1PR4        | SLCO2A1  | TARS      | TSPYL2    | ZBTB10   |           |
| PYCRL     | SACS         | SMAP1    | TASP1     | TTC30B    | ZBTB16   |           |
| PYGB      | SAMD8        | SMPD2    | TBC1D15   | TTK       | ZBTB24   |           |
| PYROXD1   | SAP30        | SMS      | TBC1D16   | TUBA3D    | ZBTB25   |           |
| RAB11FIP1 | SASH1        | SNAPC5   | TBC1D4    | TUBA3E    | ZBTB8A   |           |
| RAB32     | SAT1         | SNORA4   | TBC1D8    | TUBB2A    | ZC3H12A  |           |
| RAB3B     | SC4MOL       | SNORA59B | TBRG1     | TUFT1     | ZCCHC6   |           |
| RAB4A     | SCAP         | SNORA80  | TCEAL3    | TXNDC11   | ZCCHC9   |           |

(Continued)



|          |          |          |           |        |         |  |
|----------|----------|----------|-----------|--------|---------|--|
| RAD54L   | SCARNA11 | SNORD88B | TEDDM1    | TXNL4B | ZDHHC20 |  |
| RALBP1   | SCNN1G   | SNTB2    | TEX2      | UAP1   | ZDHHC21 |  |
| RALGPS2  | SEC13    | SNX10    | TGFBR2    | UBE2G1 | ZDHHC8P |  |
| RALY     | SEC14L1  | SNX22    | THEX1     | UBE2J1 | ZDHHC9  |  |
| RANBP2   | SEC24A   | SNX25    | THYN1     | UBE2NL | ZFH3    |  |
| RANBP2L1 | SEC24D   | SOAT1    | TIPARP    | UCK2   | ZFP36   |  |
| RAP1GAP  | SELS     | SOCS2    | TMED7     | UGDH   | ZNF101  |  |
| RASA3    | SEPP1    | SPATA13  | TMEM127   | UHRF2  | ZNF18   |  |
| RASD1    | SERP1    | SPATA2   | TMEM149   | UPP1   | ZNF185  |  |
| RASSF3   | SGK      | SPC25    | TMEM150A  | USO1   | ZNF215  |  |
| RBM28    | SGK1     | SPCS3    | TMEM164   | USP10  | ZNF226  |  |
| RBM45    | SGMS2    | SPDEF    | TMEM2     | USP30  | ZNF259  |  |
| RBPJ     | SGOL1    | SPDYA    | TMEM214   | USP33  | ZNF286C |  |
| RCAN1    | SGSM1    | SPHAR    | TMEM39A   | USP38  | ZNF347  |  |
| RCBTB1   | SHRM     | SPOCK1   | TMEM56    | USP48  | ZNF350  |  |
| RER1     | SHROOM3  | SPRED2   | TMEM79    | USP6   | ZNF367  |  |
| RFPL1    | SIK1     | SPRYD5   | TMEM8     | USP8   | ZNF470  |  |
| RGMB     | SIPA1L2  | SPSB1    | TMEM87B   | VCL    | ZNF518B |  |
| RGPD1    | SKIL     | SQLE     | TMPRSS2   | VDR    | ZNF542  |  |
| RGPD2    | SLBP     | SRD5A1   | TNFAIP3   | VGFB   | ZNF552  |  |
| RGS9BP   | SLC16A6  | SRP19    | TNFRSF10A | VPS26B | ZNF57   |  |
| RHOB     | SLC25A13 | SSR1     | TNFRSF10B | VPS33B | ZNF570  |  |
| RHOBTB2  | SLC25A30 | SSR2     | TNFRSF12A | VPS37B | ZNF597  |  |
| RHOU     | SLC26A2  | SSR3     | TOR1AIP2  | VPS4A  | ZNF611  |  |
| RIMS4    | SLC29A2  | SSX2IP   | TOR2A     | WDFY2  | ZNF613  |  |
| RIT1     | SLC2A1   | ST3GAL4  | TP53I11   | WDR1   | ZNF695  |  |

**Supplementary Table S5: 1 nM DHT-activated genes in the LNCaP-LacZ derivative.** Genes highlighted in green are also up-regulated in response to 10 nM DHT

|          |          |          |
|----------|----------|----------|
| ABCC4    | HMOX2    | SNORD30  |
| ALDH1A3  | HOMER2   | SNORD46  |
| AMAC1L2  | IL1RAPL1 | SNORD88B |
| APOA1    | INPP4B   | SPPL2B   |
| ASF1B    | IPPK     | TARP     |
| AZGP1    | KCNN2    | TBC1D25  |
| BTG1     | KLK2     | TBX19    |
| C12orf77 | KLK3     | TMEFF2   |
| C16orf75 | KLK4     | TMEM79   |
| C19orf48 | LCP1     | TMPRSS2  |
| C1orf116 | LIG4     | TP53TG1  |
| CC2D2A   | LIN9     | TRIM65   |
| CCDC74A  | LSP1     | TRPM8    |
| CDC45L   | MAD2L1   | TUBA3D   |
| CDCA5    | MCCC2    | TUBB2A   |
| CDKN2B   | MCM4     | UBE2K    |
| CDT1     | MED13    | VGFB     |
| CENPK    | MEG8     | VRK1     |
| CENPN    | MESP1    | WAPAL    |
| CLDN8    | MTHFD1L  | ZBTB16   |
| CLGN     | MTMR12   |          |
| CROT     | MTP18    |          |
| CRYM     | MUC2     |          |
| DHCR24   | NCAPG    |          |
| DHODH    | NKX3-1   |          |
| DLG2     | PALMD    |          |
| E2F2     | PASK     |          |
| EAF2     | PDIA5    |          |
| EDG7     | PLA2G7   |          |
| ELOVL5   | PMEPA1   |          |
| FAM101B  | PPP1R15B |          |
| FAM174B  | PRAGMIN  |          |
| FAM49B   | PRINS    |          |
| FAM64A   | PSMC3IP  |          |
| FANCB    | RCN3     |          |
| FANCI    | RNF150   |          |

(Continued)

|        |          |  |
|--------|----------|--|
| FEN1   | RNU86    |  |
| FERMT1 | RRP9     |  |
| GINS2  | SAC      |  |
| GINS3  | SAP30    |  |
| GINS4  | SCARNA9L |  |
| GLRX2  | SGEF     |  |
| GREB1  | SLC29A1  |  |
| GTDC1  | SLC45A3  |  |
| HELLS  | SNORD11  |  |

**Supplementary Table S6: 10 nM DHT-activated genes in the LNCaP-LacZ derivative**

|         |           |         |          |          |          |
|---------|-----------|---------|----------|----------|----------|
| ABCC4   | C13orf1   | CDT1    | FADS1    | GSTT2    | LIMCH1   |
| ACOX3   | C13orf7   | CENPK   | FAM105A  | GTDC1    | LIN7B    |
| ACSL3   | C14orf106 | CENPM   | FAM105B  | GTF3A    | LIN9     |
| ACSM3   | C15orf23  | CENPN   | FAM110B  | GUCY1A3  | LMNB1    |
| ACTR3   | C15orf29  | CHRNA2  | FAM129A  | HAUS8    | LONRF1   |
| ADI1    | C16orf61  | CIDEB   | FAM174B  | HEBP2    | LPAR3    |
| ADRA2A  | C16orf75  | CKS1B   | FAM176B  | HERC3    | LPXN     |
| AGPAT5  | C17orf48  | CLDN8   | FAM188B  | HERC5    | LRP8     |
| AGR2    | C17orf98  | CLGN    | FAM46D   | HGD      | LSM6     |
| ALDH1A3 | C19orf10  | CMTM7   | FAM49B   | HLA-DRA  | LYAR     |
| AMAC1L2 | C19orf23  | COG5    | FAM55C   | HMGB1    | MAD2L1   |
| AMHR2   | C19orf36  | CREB3L2 | FAM65B   | HMGB2    | MAK16    |
| ANKRD22 | C19orf48  | CREB3L4 | FANCI    | HMOX2    | MAP3K14  |
| ANKRD37 | C1orf116  | CRELD2  | FBXO5    | HOMER1   | MAP3K5   |
| APBB1IP | C1orf201  | CROT    | FEN1     | HOMER2   | MAP9     |
| APIP    | C1orf21   | CRYM    | FERMT1   | HSPA5    | MCCC2    |
| APLN    | C1orf24   | CUTC    | FERMT3   | HSPC111  | MCEE     |
| APOD    | C21orf56  | CYR61   | FICD     | HUS1B    | MCM2     |
| ARFIP2  | C2orf76   | DBI     | FKBP5    | ICAM3    | MCM4     |
| ARG2    | C3orf15   | DEGS1   | FLJ12684 | IDH1     | MCM5     |
| ARID3A  | C3orf25   | DHCR24  | FLJ23754 | IDI1     | MCTS1    |
| ARMET   | C6orf173  | DHRS3   | FLJ39827 | IER3IP1  | MED30    |
| ARSG    | C7orf54   | DLG2    | FOXD4    | IL1RAPL1 | MEIS1    |
| ASAH1   | C9orf140  | DNAJB9  | FOXD4L1  | IMPA2    | MESP1    |
| ASF1B   | C9orf152  | DNAJC25 | FOXD4L2  | INHBB    | MEX3B    |
| ASNA1   | C9orf72   | DNASE1  | FRAP1    | INPP4B   | MGC29506 |

(Continued)

|          |          |          |          |          |          |
|----------|----------|----------|----------|----------|----------|
| ASPM     | C9orf91  | DNM1L    | FSIP1    | INSIG1   | MGC35440 |
| ATAD2    | C9orf98  | DOCK2    | GAGE12D  | IQGAP2   | MICAL1   |
| ATMIN    | CALHM2   | DYNLRB2  | GAL      | IRS2     | MIR1974  |
| ATP11B   | CBWD3    | E2F1     | GALK2    | ITGAV    | MMEL1    |
| AZGP1    | CBWD5    | E2F2     | GAS1     | JPH1     | MORC4    |
| B2M      | CCAR1    | EAF2     | GDF15    | KCNN2    | MPHOSPH9 |
| B3GNTL1  | CCDC74A  | EBP      | GGCT     | KDELR2   | MPP6     |
| B4GALT1  | CCDC74B  | EDG7     | GINS2    | KIAA1244 | MPZL2    |
| BEND4    | CCDC86   | EIF2S1   | GINS3    | KIF11    | MT1X     |
| BET1     | CCNA2    | EIF4E1B  | GINS4    | KIF22    | MTHFD1L  |
| BHLHB2   | CCNB2    | ELK4     | GLB1L2   | KLF15    | MTMR9    |
| BMPR1A   | CCRN4L   | ELL2     | GLIPR2   | KLK2     | MTP18    |
| BMPR2    | CD320    | ELOVL1   | GLRX2    | KLK3     | NANS     |
| BRCA1    | CDC25A   | ELOVL5   | GLUD1    | KLK4     | NCAPD3   |
| BRP44    | CDC45L   | EPDR1    | GLYATL1  | KRT18    | NCAPG    |
| BTG1     | CDCA5    | ERGIC2   | GMFG     | L3MBTL3  | NDRG1    |
| BTN3A3   | CDCA7    | ERP44    | GNB4     | LAMC1    | NDUFA5   |
| C11orf82 | CDH15    | ERRFI1   | GPM6B    | LCP1     | NEDD4L   |
| C12orf73 | CDK2AP2  | EXOSC5   | GREB1    | LDLR     | NEFH     |
| C12orf77 | CDK5R2   | EXTL2    | GRHL2    | LGALS1   | NFKBIA   |
| NKX3-1   | PPAPDC1B | SAP30    | SNORD56  | TWIST1   |          |
| NOP16    | PPFIBP1  | SASH1    | SNORD57  | TWISTNB  |          |
| NOSTRIN  | PPFIBP2  | SCARNA9  | SNORD73A | UAP1     |          |
| NPHP4    | PIIB     | SDF2L1   | SNORD88B | UBE2J1   |          |
| NR2C2AP  | PRAGMIN  | SEC11C   | SNORD99  | UBE2K    |          |
| NSMAF    | PRDX6    | SEC24A   | SOAT1    | UCHL5    |          |
| NUBP1    | PRKCA    | SEC24D   | SPATA13  | UCHL5IP  |          |
| NUDT16P  | PRRT2    | SEC61B   | SPCS3    | UGT2B28  |          |
| NUP35    | PSMC3IP  | SEMA3C   | SPDEF    | UHRF2    |          |
| NUP62CL  | PTGER4   | Sep-07   | SPHAR    | UNC84B   |          |
| NXT1     | PTMA     | SERPINE2 | SRM      | VGf      |          |
| OAT      | PTPRM    | SFXN2    | SSR3     | VN1R1    |          |
| OAZ3     | PTRH2    | SGEF     | SSSCA1   | VRK1     |          |
| OR7E91P  | PUSL1    | SH2D1A   | STARD3NL | WAS      |          |
| OSBPL5   | PXDN     | SLBP     | STK39    | WDYHV1   |          |
| OSTCL    | PYCRL    | SLC16A6  | STRA13   | WIPI1    |          |
| P2RY5    | QPCTL    | SLC1A5   | SYTL1    | WWC1     |          |

(Continued)

|         |          |          |         |         |  |
|---------|----------|----------|---------|---------|--|
| PAK1IP1 | RAB27A   | SLC22A4  | TAF1A   | WWOX    |  |
| PALMD   | RAB32    | SLC25A15 | TARP    | ZBTB10  |  |
| PAQR4   | RAB33B   | SLC29A1  | TBC1D4  | ZBTB16  |  |
| PARVA   | RAB36    | SLC2A12  | TFAP4   | ZCCHC6  |  |
| PASK    | RAB3B    | SLC30A7  | TIMP1   | ZDHHC23 |  |
| PCNA    | RAB4A    | SLC35F2  | TMEFF2  | ZFP14   |  |
| PCTP    | RAD51AP1 | SLC36A1  | TMEM109 | ZNF124  |  |
| PCYT2   | RANBP2   | SLC39A10 | TMEM149 | ZNF215  |  |
| PDIA4   | RAP1A    | SLC39A6  | TMEM194 | ZNF285A |  |
| PDIA5   | RARB     | SLC41A1  | TMEM231 | ZNF350  |  |
| PDLIM5  | RBMY2FP  | SLC43A1  | TMEM39A | ZNF556  |  |
| PDSS1   | RER1     | SLC45A3  | TMEM52  | ZNF670  |  |
| PEA15   | RFP      | SLC9A2   | TMEM55A | ZNF714  |  |
| PFKFB2  | RFPL2    | SMAD9    | TMEM79  | ZNF844  |  |
| PGM2    | RFPL3    | SMPD2    | TMPRSS2 |         |  |
| PGM3    | RHOBTB3  | SMS      | TMSB15A |         |  |
| PHF11   | RHOU     | SND1     | TNFAIP8 |         |  |
| PIGH    | RIMS4    | SNHG1    | TOP2A   |         |  |
| PIK3AP1 | RLN1     | SNORA24  | TP53AP1 |         |  |
| PLA2G7  | RNF150   | SNORA32  | TP53TG1 |         |  |
| PLD4    | RNU4-2   | SNORA4   | TRAM1L1 |         |  |
| PMAIP1  | RNU86    | SNORA41  | TRIM48  |         |  |
| PMEPA1  | RPIA     | SNORA57  | TRIM61  |         |  |
| PMM2    | RPL22L1  | SNORD11  | TRIP13  |         |  |
| PMS1    | RPS7     | SNORD12C | TRPM8   |         |  |
| PNKD    | RRP9     | SNORD16  | TRQ1    |         |  |
| POLR3K  | S100A10  | SNORD30  | TSPAN1  |         |  |
| POP7    | S100A11  | SNORD31  | TTK     |         |  |
| PPAP2A  | S100A6   | SNORD32A | TUBA3D  |         |  |

**Supplementary Table S7: Overlap of AR<sub>W741L</sub> bicalutamide-activated transcriptome with known AR-target gene signatures: Hieronymus *et al.*, 2006 (left panel) and Nelson *et al.*, 2002 (right panel)**

| Hieronymus <i>et al.</i> , (2006) Gene expression signature | LNCaP-AR <sub>W741L</sub> + 10 nM casodex | LNCaP LacZ + 10 nM DHT |
|-------------------------------------------------------------|-------------------------------------------|------------------------|
| KLK3                                                        | Green                                     | Green                  |
| TMPRSS2                                                     | Green                                     | Green                  |
| NKX3.1                                                      | Green                                     | Green                  |
| KLK2                                                        | Green                                     | Green                  |
| GNMT                                                        | Red                                       | Red                    |
| PMEPA1                                                      | Green                                     | Green                  |
| MPHOS9                                                      | Green                                     | Green                  |
| ZBTB10                                                      | Green                                     | Green                  |
| EAF2                                                        | Green                                     | Green                  |
| BM039                                                       | Green                                     | Green                  |
| SARG                                                        | Red                                       | Red                    |
| ACSL3                                                       | Green                                     | Green                  |
| PTGER4                                                      | Green                                     | Green                  |
| ABCC4                                                       | Green                                     | Green                  |
| NNMT                                                        | Red                                       | Red                    |
| ADAM7                                                       | Red                                       | Red                    |
| FKBP5                                                       | Green                                     | Green                  |
| ELL2                                                        | Green                                     | Green                  |
| MED28                                                       | Red                                       | Red                    |
| HERC3                                                       | Green                                     | Green                  |
| MAF                                                         | Red                                       | Red                    |

| Nelson <i>et al.</i> , (2002) Gene expression signature | LNCaP-AR <sub>W741L</sub> + 10 nM casodex | LNCaP LacZ + 10 nM DHT |
|---------------------------------------------------------|-------------------------------------------|------------------------|
| ABCC4                                                   | Green                                     | Green                  |
| ACTN1                                                   | Red                                       | Red                    |
| ADAMTS1                                                 | Red                                       | Red                    |
| AKAP12                                                  | Red                                       | Red                    |
| AKAP2                                                   | Red                                       | Red                    |
| ALDH1A3                                                 | Green                                     | Green                  |
| ANKH                                                    | Red                                       | Red                    |
| APPBP2                                                  | Red                                       | Red                    |
| AZGP1                                                   | Green                                     | Green                  |
| B2M                                                     | Red                                       | Green                  |
| B4GALT1                                                 | Green                                     | Green                  |

| Nelson <i>et al.</i> , (2002) Gene expression signature | LNCaP-AR <sub>W741L</sub> + 10 nM casodex | LNCaP LacZ + 10 nM DHT |
|---------------------------------------------------------|-------------------------------------------|------------------------|
| CAMKK2                                                  | Green                                     | Red                    |
| CDC14A                                                  | Red                                       | Red                    |
| CPD                                                     | Red                                       | Red                    |
| DBI                                                     | Green                                     | Green                  |
| DCTN3                                                   | Red                                       | Red                    |
| DHCR24                                                  | Green                                     | Green                  |
| DNAJB9                                                  | Green                                     | Green                  |
| ELL2                                                    | Green                                     | Green                  |
| ELOVL5                                                  | Green                                     | Green                  |
| FACL3                                                   | Green                                     | Green                  |
| FAD55                                                   | Red                                       | Red                    |
| GP110                                                   | Red                                       | Red                    |
| GSR                                                     | Red                                       | Red                    |
| GUCY1A3                                                 | Green                                     | Red                    |
| HIF0                                                    | Red                                       | Red                    |
| HERC3                                                   | Green                                     | Green                  |
| HMGCS1                                                  | Green                                     | Red                    |
| HOMER2                                                  | Green                                     | Green                  |
| ID2                                                     | Green                                     | Red                    |
| IDI1                                                    | Green                                     | Green                  |
| INPP4B                                                  | Green                                     | Green                  |
| IQGAP2                                                  | Green                                     | Red                    |
| ITGAV                                                   | Green                                     | Green                  |
| KLF4                                                    | Red                                       | Red                    |
| KLK2                                                    | Green                                     | Green                  |
| KLK3                                                    | Green                                     | Green                  |
| KLK4                                                    | Green                                     | Green                  |
| KRT18                                                   | Green                                     | Green                  |
| KRT19                                                   | Red                                       | Red                    |
| KRT8                                                    | Green                                     | Red                    |
| LIFR                                                    | Green                                     | Red                    |
| LMAN1                                                   | Red                                       | Red                    |
| MAF                                                     | Red                                       | Red                    |
| MERTK                                                   | Green                                     | Red                    |
| MLCB                                                    | Green                                     | Red                    |
| MRF2                                                    | Red                                       | Red                    |
| NDRG1                                                   | Green                                     | Green                  |
| NKX3.1                                                  | Green                                     | Green                  |

| Nelson <i>et al.</i> , (2002) Gene expression signature | LNCaP-AR <sub>W741L</sub> + 10 nM casodex | LNCaP LacZ + 10 nM DHT |
|---------------------------------------------------------|-------------------------------------------|------------------------|
| ORM1                                                    | Red                                       | Red                    |
| PDLIM5                                                  | Green                                     | Green                  |
| PGM3                                                    | Green                                     | Green                  |
| PHYH                                                    | Red                                       | Red                    |
| PIAS1                                                   | Green                                     | Red                    |
| PPAP2A                                                  | Green                                     | Green                  |
| PTPN21                                                  | Red                                       | Red                    |
| RAB4                                                    | Green                                     | Green                  |
| SAT                                                     | Green                                     | Red                    |
| SEC24D                                                  | Green                                     | Green                  |
| SEPP1                                                   | Green                                     | Red                    |
| SGK                                                     | Green                                     | Red                    |
| SLC26A2                                                 | Green                                     | Red                    |
| SMS                                                     | Green                                     | Green                  |
| SNAP25                                                  | Red                                       | Red                    |
| SORD                                                    | Red                                       | Red                    |
| SPAK                                                    | Green                                     | Green                  |
| SPDEF                                                   | Green                                     | Green                  |
| SPRP19                                                  | Green                                     | Red                    |
| TCRG/TARP                                               | Green                                     | Green                  |
| TMEPA1                                                  | Green                                     | Green                  |
| TMPRSS2                                                 | Green                                     | Green                  |
| TNFAIP8                                                 | Green                                     | Green                  |
| TPD52                                                   | Red                                       | Red                    |
| TSC22                                                   | Green                                     | Red                    |
| UAP1                                                    | Green                                     | Green                  |
| UGHD                                                    | Green                                     | Red                    |
| UNC13                                                   | Red                                       | Red                    |
| VAPA                                                    | Red                                       | Red                    |
| ZBTB10                                                  | Green                                     | Green                  |
